# Supplementary material for: Monotonous alloying-driven band edge emission in two-dimensional hexagonal GaSe1−xTex semiconductors for visible to near-infrared photodetection
Source: Royal Society of Chemistry journal article supplement (doi:10.1039/d2tc04252e), 2022-12-12
Supplement: d2tc04252e1.pdf [file d2tc04252e1.pdf]

## Electronic Supplementary Information

### Monotonously Alloying-Driven Band Edge Emission in Two-Dimensional Hexagonal GaSe<sub>1-x</sub>Te<sub>x</sub> Semiconductors for Visible to Near-Infrared Photodetection

Nhu Quynh Diep,<sup>1</sup> Yu Xun Chen,<sup>1</sup> Duc Loc Nguyen,<sup>1</sup> My Ngoc Duong,<sup>1</sup> Ssu Kuan Wu,<sup>1</sup> Cheng Wei Liu,<sup>1</sup> Hua Chiang Wen,<sup>1</sup> Wu Ching Chou,<sup>1,\*</sup> Jenh Yih Juang,<sup>1</sup> Yao Jane Hsu,<sup>2</sup> Van Qui Le,<sup>3</sup> Ying Hao Chu,<sup>3</sup> and Sa Hoang Huynh.<sup>1</sup>

<sup>1</sup>Department of Electrophysics, National Yang Ming Chiao Tung University, Hsinchu 30010, Taiwan.

<sup>2</sup>National Synchrotron Radiation Research Center (NSRRC), Hsinchu Science Park, Hsinchu 30076, Taiwan.

<sup>3</sup>Department of Materials Science and Engineering, National Tsing Hua University, Hsinchu 30013, Taiwan.

\*Corresponding authors: Prof. Wu Ching Chou ([wcchou957@nycu.edu.tw](mailto:wcchou957@nycu.edu.tw))

**Table S1.** Solid Te composition extracted from XRD-2Theta scans and EDX, and lattice parameters of GaSe<sub>1-x</sub>Te<sub>x</sub>

| Nominal Te composition ( $x^0$ ) | Solid Te composition ( $x$ ) extracted from |         |       | Lattice parameters (Å) |        |
|----------------------------------|---------------------------------------------|---------|-------|------------------------|--------|
|                                  | XRD_a                                       | XRD_c/4 | EDX   | a                      | c      |
| 0                                | 0                                           | 0       | 0     | 3.755                  | 15.884 |
| 0.2                              | 0.073                                       | 0.095   | 0.069 | 3.776                  | 15.976 |
| 0.33                             | 0.134                                       | 0.174   | 0.142 | 3.795                  | 16.062 |
| 0.5                              | 0.247                                       | 0.290   | 0.229 | 3.833                  | 16.199 |
| 0.65                             | 0.292                                       | 0.353   | 0.251 | 3.843                  | 16.258 |
| 0.75                             | 0.328                                       | 0.401   | 0.352 | 3.854                  | 16.309 |
| 0.85                             | 0.370                                       | 0.448   | 0.395 | 3.867                  | 16.361 |

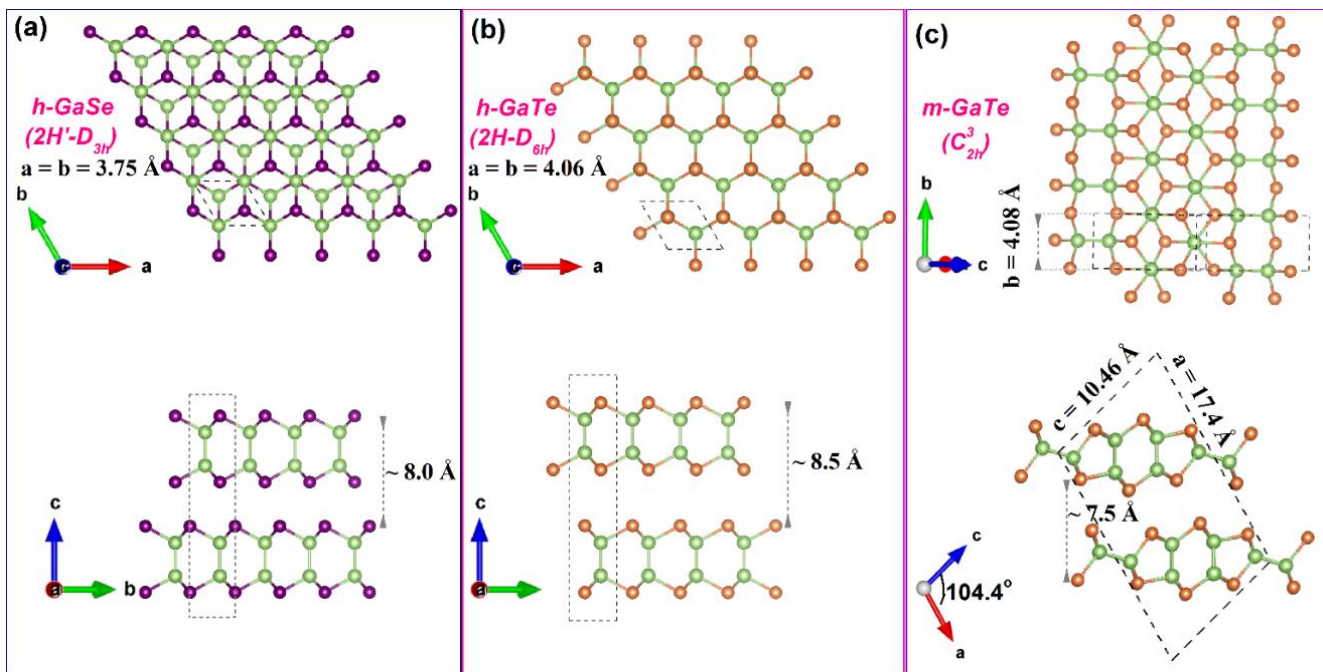

Figure S1. Visualization of the crystal structures of 2D GaSe and GaTe materials by VESTA software.<sup>1</sup>

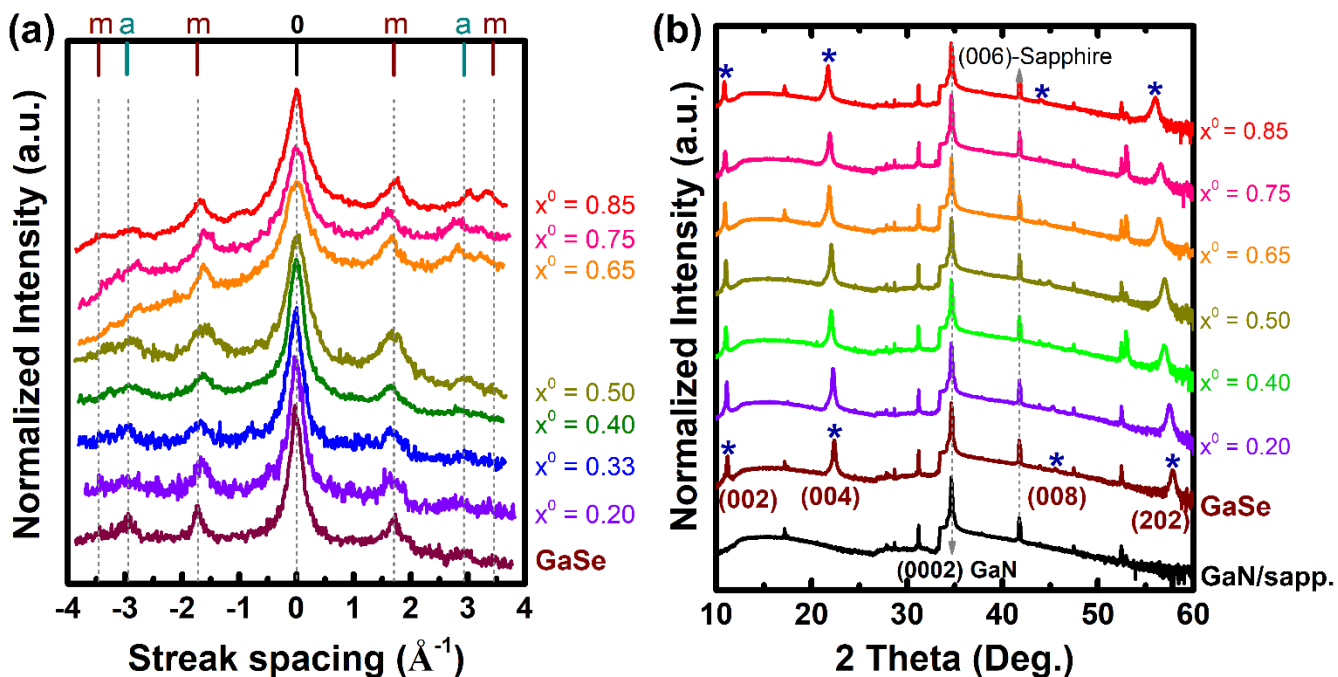

Figure S2. (a) RHEED intensity profiles and (b)  $2\theta$ -XRD scans of the upward GaSeTe alloys versus nominal Te composition.

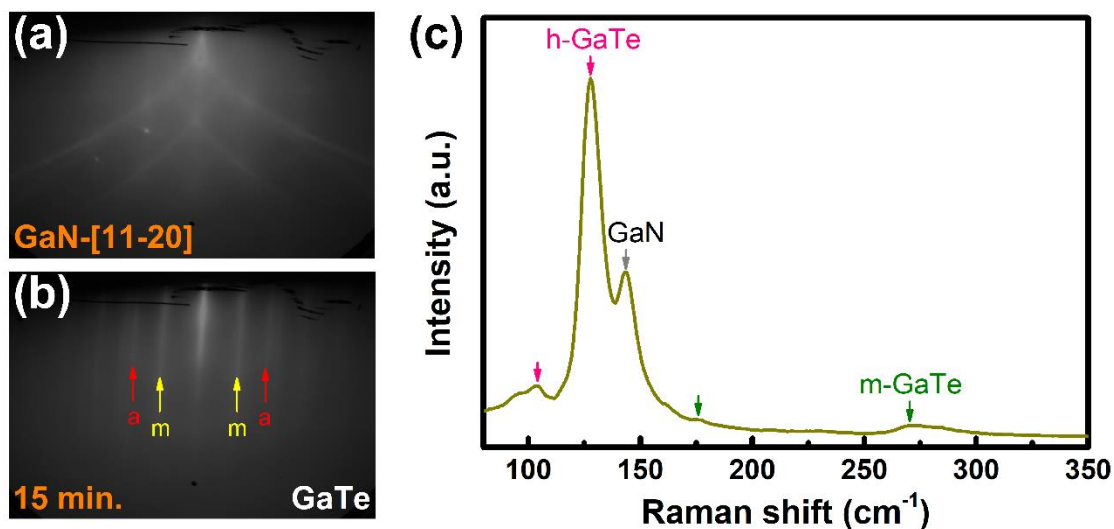

**Figure S3.** RHEED pattern of (a) GaN/sapphire platform and (b) 15-min GaTe grown layer on GaN/sapphire at 525 °C, (c) 532-nm Raman spectrum of the 2hr-GaTe grown layer on GaN/Sapphire platform. (Reproduced from S.H. Huynh et al., ACS Appl. Nano Mater., 2021, 4, 8913-8921)

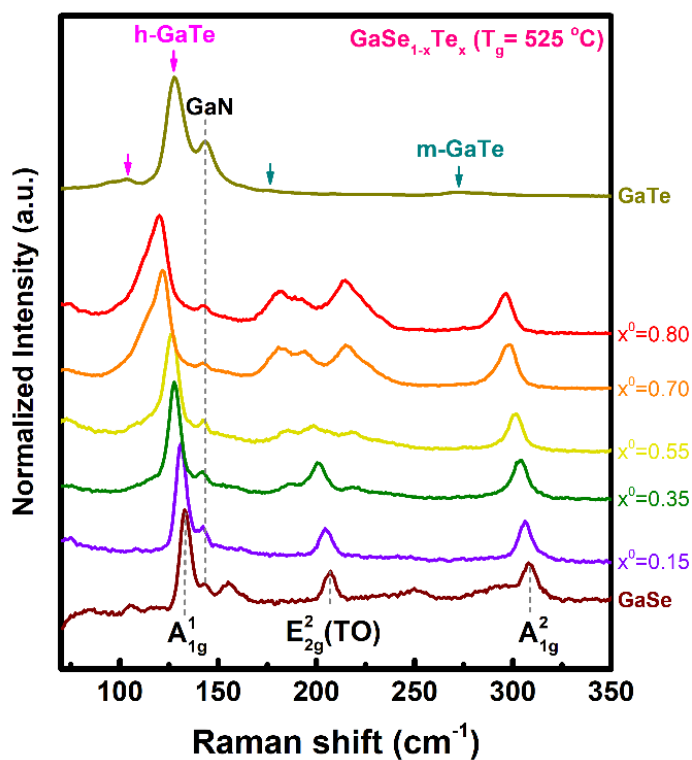

**Figure S4.** 532-nm Raman spectra of the downward GaSeTe alloys measured at room temperature versus nominal Te composition.

### Photoluminescence of GaSe grown on GaN/sapphire template at $T_s = 560$ °C

Temperature-dependent PL measurements of the GaSe ( $x = 0$ ) sample were carried out to determine the optical bandedge emission energy of GaSe grown on GaN/sapphire as shown in Fig. S5a. The 10K-PL spectrum of GaSe is composed of two typical emission bands positioned at  $\sim 1.774$  eV (peak I), and  $\sim 1.856$  eV (peak II). Peak I was attributed to the emission of the exciton originated from the SDD growth as reported previously,<sup>2</sup> while peak II located at the higher energy is believed to be the emission of the exciton initiated from the LBL growth.<sup>3</sup> We noted a redshift as well as deterioration of all PL peaks as increasing the temperature, where the free excitonic emission (peak II) shifted an energy of  $\sim 90$  meV (from  $\sim 1.856$  eV to  $\sim 1.765$  eV) when the temperature was raised from 10 K to 120 K (Fig. S5b). The temperature evolution of peak II shown in the inset of Fig. S5b is excellently fitted to the Varshni's empirical equation.<sup>4</sup> As a result, the bandgap energy of the GaSe sample grown on GaN/sapphire template in this study is estimated to be  $\sim 1.86$  eV.

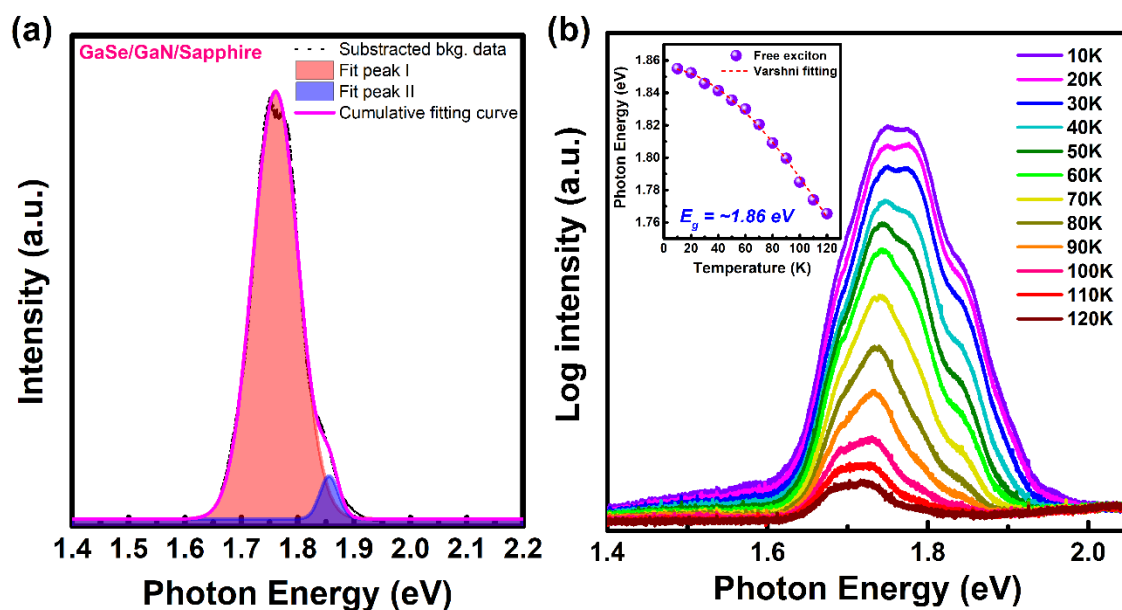

**Figure S5.** (a) Low-temperature PL emission of GaSe grown at  $T_s=560$  °C. (b) Temperature-dependent PL spectra of GaSe grown at 560 °C. Inset of (b) is Varshni fitting curve of the corresponding excitonic emission.

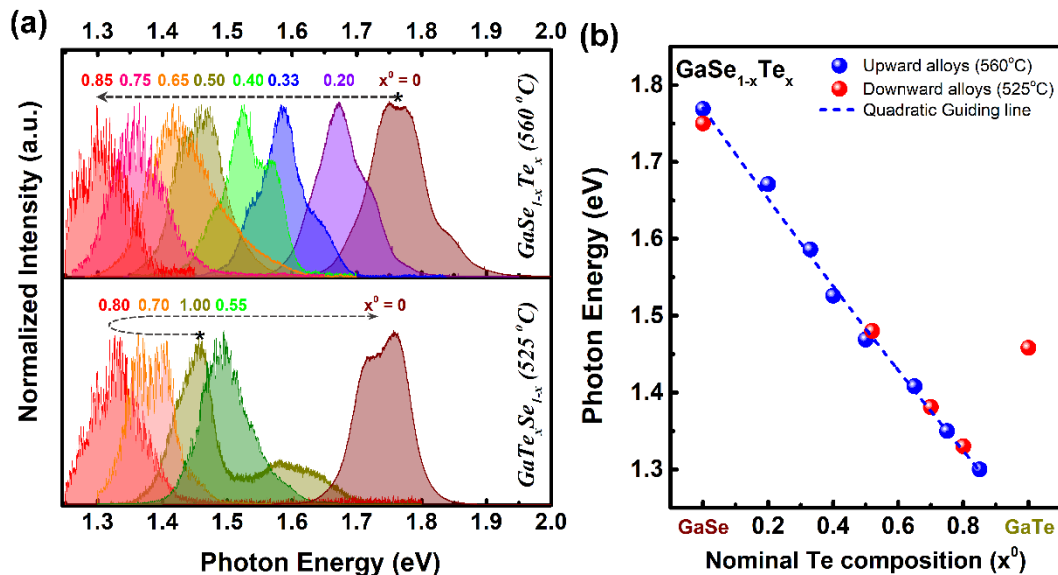

**Figure S6.** Evolution of the central PL band emission versus nominal Te concentration of both upward and downward alloy series.

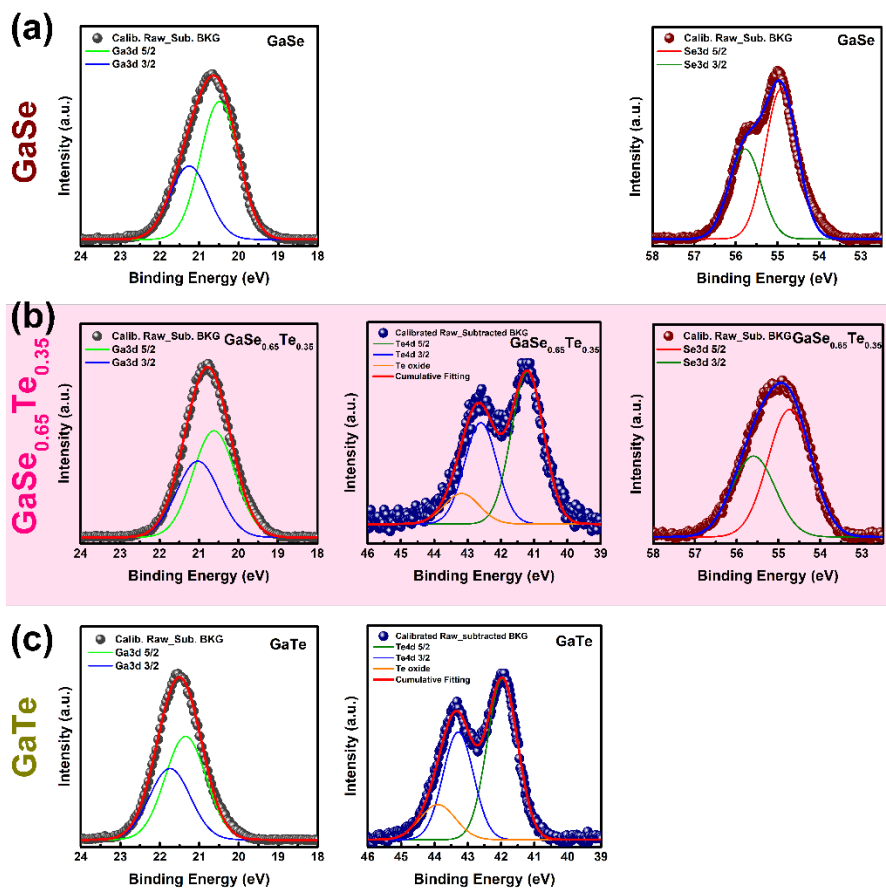

**Figure S7.** Synchrotron XPS spectra of Ga 3d, Te 4d, and Se 3d core levels of (a) GaSe, (b)  $\text{GaSe}_{0.65}\text{Te}_{0.35}$ , and (c) GaTe.

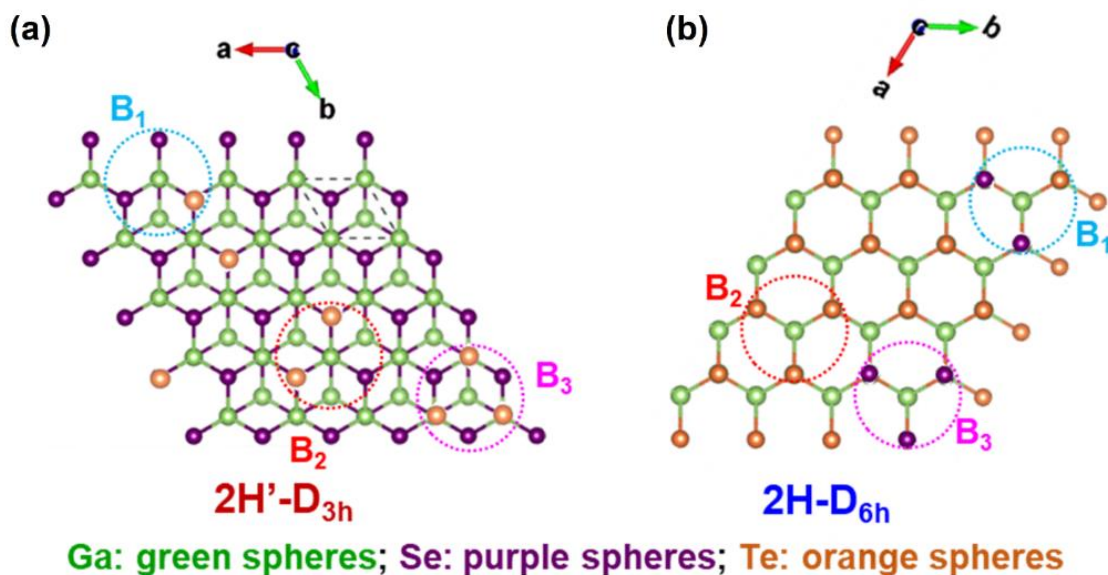

**Figure S8.** Visualized exemplification of atomic arrangement observed from the top view of (a)  $2H'-D_{3h}$   $GaSe_{1-x}Te_x$  crystal, and (b)  $2H-D_{6h}$   $GaSe_{1-x}Te_x$  crystal.

## References

- 1 K. Momma and F. Izumi. VESTA: a three-dimensional visualization system for electronic and structural analysis. *Journal of Applied crystallography* **41**, 653-658 (2008).
- 2 N. Q. Diep, C.-W. Liu, S.-K. Wu, W.-C. Chou, S. H. Huynh, and E. Y. Chang. Screw-dislocation-driven growth mode in two dimensional GaSe on GaAs (001) substrates grown by molecular beam epitaxy. *Scientific reports* **9**, 1-8 (2019).
- 3 H. Cai, E. Soignard, C. Ataca, B. Chen, C. Ko, T. Aoki, A. Pant, X. Meng, S. Yang, and J. Grossman. Band engineering by controlling vdW epitaxy growth mode in 2D gallium chalcogenides. *Advanced Materials* **28**, 7375-7382 (2016).
- 4 Y. P. Varshni. Temperature dependence of the energy gap in semiconductors. *physica* **34**, 149-154 (1967).
